# Supplementary material
Source: PubMed Central journal article supplement (PMC6153076)
Supplement: NIHMS984718-supplement-1.pdf [file NIHMS984718-supplement-1.pdf]

Supplementary Table 1. Effect of sex on the relationship between BDNF Val66Met and clinical disease markers in Dominantly Inherited AD.

|            | Episodic Memory   |              | Hippocampal Volume                |             | CSF tau                        |                                       | PiB-PET SUVR      |                                        |
|------------|-------------------|--------------|-----------------------------------|-------------|--------------------------------|---------------------------------------|-------------------|----------------------------------------|
| BDNF       | -0.567<br>(0.253) | .033         | -643.826<br>(280.734)             | .023        | 83.122<br>(20.227)             | .0002                                 | 0.554<br>(0.257)  | .033                                   |
| EYO        | -0.028<br>(0.010) | .007         | -25.806<br>(9.447)                | .007        | 1.547<br>(0.734)               | .038                                  | 0.042<br>(0.008)  | <b>3.59x</b><br><b>10<sup>-7</sup></b> |
| Sex        | -0.185<br>(0.214) | .390         | 480.431<br>(236.524)              | .044        | -4.287<br>(14.860)             | .774                                  | 0.108<br>(0.218)  | .622                                   |
| Race       | -0.333<br>(0.193) | .088         | -49.124<br>(224.594)              | .827        | -14.740<br>(19.175)            | .447                                  | -0.231<br>(0.208) | .269                                   |
| BDNF x Sex | 0.012<br>(0.290)  | .968         | 77.788<br>(343.965)               | .822        | -38.712<br>(26.910)            | .159                                  | -0.502<br>(0.326) | .127                                   |
| Sex x EYO  | 0.016<br>(0.014)  | .286         | 11.861<br>(14.214)                | .405        | -2.216<br>(1.034)              | .035                                  | 0.003<br>(0.013)  | .829                                   |
| BDNF x EYO | -0.053<br>(0.016) | <b>.0009</b> | <b>-35.507</b><br><b>(15.752)</b> | <b>.025</b> | <b>5.641</b><br><b>(1.317)</b> | <b>4.5x</b><br><b>10<sup>-5</sup></b> | 0.017<br>(0.014)  | .212                                   |

Note: Sex was coded as Male/Female; Race was coded as White/Non-White; EYO = Estimated Years to Symptom Onset; CSF = Cerebrospinal Fluid; PiB-PET SUVR = Positron Emission Tomography (using Pittsburgh Compound B) Standardized Uptake Value Ratio
